# Supplementary material for: Uncovering Cognitive Strategies for ICU Parallel Nursing Multitasks: An Eye-tacking-based Hidden Markov Modeling Study
Source: Research Square preprint supplement (doi:10.21203/rs.3.rs-7975457/v1), 2026-01-20
Supplement: Supplementary file 1 [file 7bccdfdb7c6e7b2f5d886773.docx]

**Risk perception survey**

**Item1:Please rate the probability of risk in your nursing work**

1 Extremely unlikely

2 Highly unlikely

3 Unlikely

4 Possibly

5 Likely

6 Frequently

7 Always

**Item 2:Please rate the potential consequence of risk in your nursing work**

1No adverse consequences

2 Mild

3 Moderate

4 Moderately to severe

5 severe

6 Very severe

7 Extremely severe

1. **Please rate your capability to cope with risk in your nursing work**

1 Very weak

2 Weak

3 Fairly Weak

4 Average

5 Fairly Strong

6 Strong

7 Very Strong
